# Supplementary material for: Effects of a strong π-accepting ancillary ligand on the water oxidation activity of weakly coupled binuclear ruthenium catalysts
Source: Royal Society of Chemistry journal article supplement (doi:10.1039/c8dt04963g), 2019-01-01
Supplement: c8dt04963g1.pdf [file c8dt04963g1.pdf]

## Effects of a strong $\pi$ -accepting ancillary ligand on the water oxidation activity of weakly coupled binuclear ruthenium catalysts

Tiago A. Matias\*,<sup>[a]</sup> Francisca N. Rein,<sup>[b]</sup> Reginaldo C. Rocha,<sup>[b]</sup> André Luiz Barboza Formiga,<sup>[c]</sup> Henrique E. Toma,<sup>[a]</sup> Koiti Araki\*<sup>[a]</sup>

[a] Department of Chemistry, Institute of Chemistry, University of São Paulo, Av. Lineu Prestes 748, São Paulo, SP 05508-000, Brazil.

[b] Los Alamos National Laboratory, Los Alamos, New Mexico, NM 87545, USA.

[c] Institute of Chemistry, University of Campinas – UNICAMP, P.O. Box 6154, Campinas, SP 13083-970, Brazil.

E-mail: tiagomatias@usp.br; koiaraki@iq.usp.br

### Electronic supplementary information (ESI)

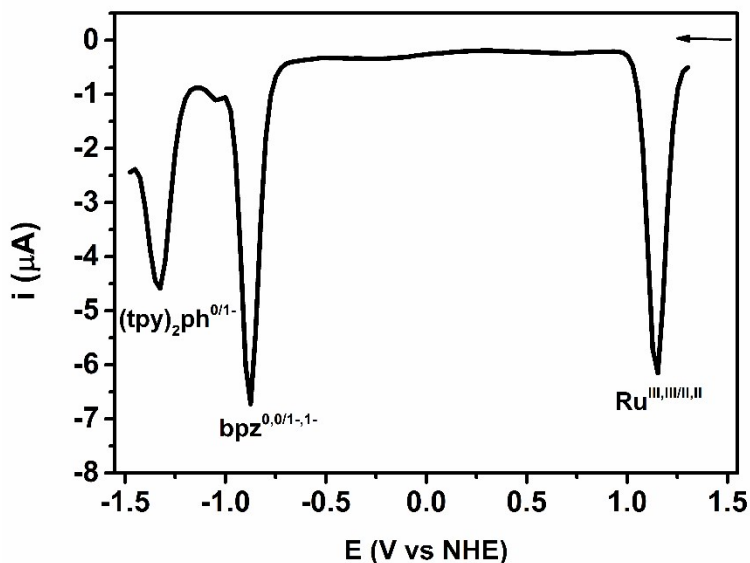

Figure S1: Differential pulse voltammogram of a 1.0 mM solution of  $[\text{RuCl}(\text{bpz})_2(\text{tpy}_2\text{ph})](\text{PF}_6)_2$  in DMF (0.10 M  $\text{Bu}_4\text{NClO}_4$ ;  $\nu = 10 \text{ mV s}^{-1}$ ).

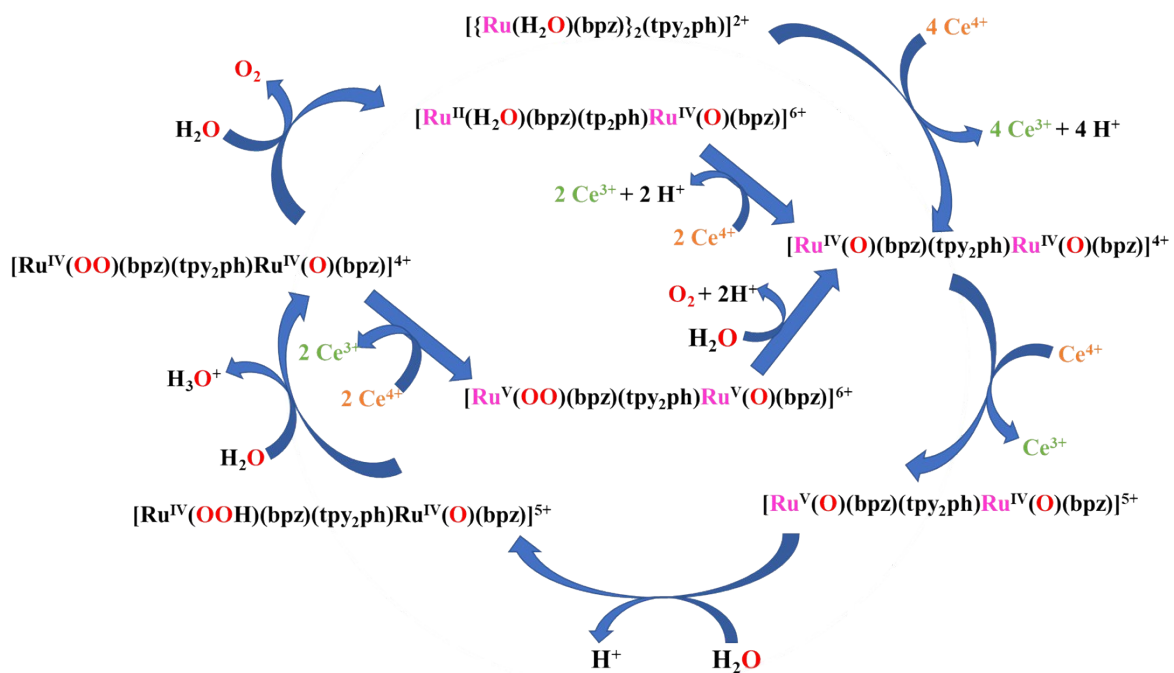

Scheme S1: Proposed catalytic mechanism for  $[\{\text{Ru}(\text{H}_2\text{O})(\text{bpz})\}_2(\text{tpy}_2\text{ph})]^{4+}$ .

Table S1. Cartesian coordinates for the complex  $[\{\text{Ru}^{\text{V}}(\text{O})(\text{bpy})\}_2(\text{tpy}_2\text{ph})]^{6+}$  obtained by BP86/SDD.

|    | x         | y         | z         |
|----|-----------|-----------|-----------|
| Ru | 6.684818  | 0.123225  | -2.477071 |
| O  | 6.400569  | 1.506975  | -3.564251 |
| Ru | -6.687368 | 0.131895  | -2.492099 |
| O  | -6.411830 | 1.502426  | -3.597756 |
| C  | 6.672127  | -2.195574 | -0.372390 |
| N  | 7.354352  | -1.591573 | -1.355122 |
| C  | 8.576694  | -2.041729 | -1.730648 |
| C  | 9.149510  | -3.151360 | -1.093579 |
| C  | 8.444447  | -3.789589 | -0.066360 |
| C  | 7.185226  | -3.306092 | 0.302262  |
| N  | 8.532440  | -0.243837 | -3.331687 |
| C  | 9.033380  | 0.507296  | -4.334866 |
| C  | 10.281248 | 0.235161  | -4.884404 |
| C  | 11.019761 | -0.844946 | -4.376257 |
| H  | 8.417310  | 1.337788  | -4.696098 |
| H  | 10.664435 | 0.859470  | -5.696491 |
| H  | 11.056851 | -2.461363 | -2.936862 |
| H  | 10.134898 | -3.517874 | -1.392344 |
| H  | 6.600514  | -3.774257 | 1.099064  |
| H  | 5.689062  | -1.799211 | -0.099762 |
| C  | 10.489134 | -1.617907 | -3.337678 |
| C  | 9.228846  | -1.301554 | -2.818281 |
| N  | 7.166797  | 1.399944  | -0.881471 |
| C  | 8.381081  | 1.941141  | -0.729687 |
| C  | 8.652072  | 2.800012  | 0.338777  |
| C  | 7.629494  | 3.093283  | 1.247624  |
| C  | 6.362801  | 2.527660  | 1.065097  |
| C  | 6.147326  | 1.677679  | -0.024921 |
| C  | 4.869173  | 1.044658  | -0.359774 |
| N  | 4.912145  | 0.285806  | -1.474124 |
| C  | 3.835934  | -0.372500 | -1.953985 |
| C  | 2.612708  | -0.272394 | -1.288061 |
| C  | 2.504934  | 0.508231  | -0.113932 |
| C  | 3.668469  | 1.169891  | 0.343422  |
| C  | 4.110326  | -1.150020 | -3.165416 |
| N  | 5.392212  | -1.080957 | -3.614129 |
| C  | 5.783622  | -1.710071 | -4.728292 |
| C  | 4.884528  | -2.487322 | -5.463344 |
| C  | 3.561133  | -2.590794 | -5.021097 |
| C  | 3.167959  | -1.915367 | -3.860485 |
| H  | 9.163595  | 1.692813  | -1.453364 |
| H  | 9.655893  | 3.220940  | 0.446363  |
| H  | 7.813200  | 3.763592  | 2.093026  |
| H  | 5.547919  | 2.752178  | 1.759024  |

|   |            |           |           |
|---|------------|-----------|-----------|
| H | 3.632322   | 1.807972  | 1.229903  |
| H | 1.749999   | -0.822562 | -1.671963 |
| H | 2.136125   | -1.977362 | -3.503487 |
| H | 2.834920   | -3.190975 | -5.577982 |
| H | 5.232199   | -3.000691 | -6.364440 |
| H | 6.824633   | -1.612142 | -5.051719 |
| C | 1.224918   | 0.636375  | 0.608993  |
| C | -1.220100  | 0.919007  | 1.989341  |
| H | -2.158898  | 1.017620  | 2.543342  |
| C | -0.002686  | 0.498787  | -0.069137 |
| H | 0.000884   | 0.329911  | -1.150192 |
| C | -0.010524  | 1.035651  | 2.679125  |
| H | -0.013892  | 1.224683  | 3.757095  |
| C | 1.202924   | 0.907419  | 1.998909  |
| H | 2.138192   | 0.996153  | 2.560450  |
| C | -6.656912  | -2.156135 | -0.353730 |
| N | -7.343397  | -1.571926 | -1.345257 |
| C | -8.565000  | -2.032927 | -1.709580 |
| C | -9.132559  | -3.132826 | -1.050890 |
| C | -8.423647  | -3.749310 | -0.013101 |
| C | -7.164980  | -3.255372 | 0.343061  |
| N | -8.534408  | -0.258371 | -3.337099 |
| C | -9.041558  | 0.473245  | -4.351261 |
| C | -10.286190 | 0.181178  | -4.898045 |
| C | -11.015134 | -0.898674 | -4.375351 |
| H | -8.432877  | 1.303750  | -4.724765 |
| H | -10.674427 | 0.789785  | -5.719615 |
| H | -11.039474 | -2.493094 | -2.911644 |
| H | -10.117606 | -3.507668 | -1.340193 |
| H | -6.577107  | -3.706195 | 1.147508  |
| H | -5.673964  | -1.752795 | -0.091009 |
| C | -10.479025 | -1.650536 | -3.324486 |
| C | -9.222328  | -1.314571 | -2.808294 |
| N | -7.172144  | 1.420090  | -0.907631 |
| C | -8.386231  | 1.961942  | -0.757430 |
| C | -8.657354  | 2.825446  | 0.307384  |
| C | -7.635132  | 3.122287  | 1.215084  |
| C | -6.368359  | 2.556279  | 1.034398  |
| C | -6.152258  | 1.702427  | -0.052441 |
| C | -4.872607  | 1.069980  | -0.384905 |
| N | -4.913723  | 0.308684  | -1.497621 |
| C | -3.837416  | -0.352114 | -1.974121 |
| C | -2.615605  | -0.252014 | -1.305968 |
| C | -2.509555  | 0.529215  | -0.131551 |
| C | -3.672771  | 1.195851  | 0.320124  |
| C | -4.112441  | -1.138155 | -3.180951 |
| N | -5.396035  | -1.079451 | -3.626167 |

|   |            |           |           |
|---|------------|-----------|-----------|
| C | -5.786982  | -1.719429 | -4.734184 |
| C | -4.886439  | -2.497238 | -5.466553 |
| C | -3.561038  | -2.590163 | -5.027806 |
| C | -3.167988  | -1.903568 | -3.873870 |
| H | -9.169285  | 1.710382  | -1.479400 |
| H | -9.661140  | 3.246626  | 0.413518  |
| H | -7.819224  | 3.794934  | 2.058381  |
| H | -5.554202  | 2.783501  | 1.728163  |
| H | -3.636905  | 1.834574  | 1.206381  |
| H | -1.752453  | -0.805601 | -1.683964 |
| H | -2.134797  | -1.957485 | -3.519795 |
| H | -2.833032  | -3.190533 | -5.582147 |
| H | -5.233868  | -3.018836 | -6.363005 |
| H | -6.829437  | -1.627438 | -5.055049 |
| C | -1.233687  | 0.648118  | 0.599343  |
| H | -11.997209 | -1.155007 | -4.784578 |
| H | -8.855041  | -4.608180 | 0.510072  |
| H | 12.005098  | -1.085523 | -4.787301 |
| H | 8.879093   | -4.657361 | 0.439167  |

Table S2. Cartesian coordinates for the complex  $[\{\text{Ru}^{\text{V}}(\text{O})(\text{bpz})\}_2(\text{tpy}_2\text{ph})]^{6+}$  obtained by BP86/SDD.

|    | x         | y         | z         |
|----|-----------|-----------|-----------|
| Ru | 6.621207  | 0.137155  | -2.490948 |
| O  | 6.198678  | 1.479289  | -3.565830 |
| Ru | -6.609878 | 0.076499  | -2.525372 |
| O  | -6.166600 | 1.335154  | -3.689094 |
| C  | 6.897851  | -2.273915 | -0.461874 |
| N  | 7.485440  | -1.561485 | -1.423212 |
| C  | 8.753317  | -1.839068 | -1.802535 |
| C  | 9.447025  | -2.881360 | -1.150418 |
| N  | 8.837160  | -3.585929 | -0.220368 |
| C  | 7.597405  | -3.326974 | 0.154005  |
| N  | 8.534639  | -0.023968 | -3.355892 |
| C  | 8.974623  | 0.764744  | -4.344304 |
| C  | 10.260531 | 0.563365  | -4.869007 |
| N  | 11.028965 | -0.390318 | -4.368429 |
| H  | 8.320238  | 1.561326  | -4.714509 |
| H  | 10.633734 | 1.207240  | -5.676577 |
| H  | 11.262153 | -1.998577 | -3.056507 |
| H  | 10.493170 | -3.108613 | -1.400230 |
| H  | 7.109956  | -3.942420 | 0.921985  |
| H  | 5.867325  | -2.050229 | -0.167325 |
| C  | 10.603020 | -1.197256 | -3.419408 |
| C  | 9.315843  | -1.019838 | -2.868247 |
| N  | 7.112553  | 1.415454  | -0.890780 |

|   |            |           |           |
|---|------------|-----------|-----------|
| C | 8.292476   | 2.025615  | -0.732485 |
| C | 8.527709   | 2.876192  | 0.351400  |
| C | 7.502775   | 3.088462  | 1.279353  |
| C | 6.269860   | 2.452714  | 1.096371  |
| C | 6.090781   | 1.616499  | -0.011220 |
| C | 4.839419   | 0.919773  | -0.331379 |
| N | 4.897211   | 0.167971  | -1.448449 |
| C | 3.851491   | -0.544314 | -1.923700 |
| C | 2.632615   | -0.502276 | -1.243503 |
| C | 2.504892   | 0.274013  | -0.068158 |
| C | 3.641494   | 0.983243  | 0.386982  |
| C | 4.154447   | -1.314362 | -3.137142 |
| N | 5.428263   | -1.191746 | -3.602871 |
| C | 5.834300   | -1.829291 | -4.705396 |
| C | 4.964929   | -2.660328 | -5.418198 |
| C | 3.651539   | -2.812865 | -4.961312 |
| C | 3.240363   | -2.133851 | -3.808631 |
| H | 9.080183   | 1.842351  | -1.469099 |
| H | 9.505916   | 3.353973  | 0.456956  |
| H | 7.657797   | 3.747180  | 2.139388  |
| H | 5.453673   | 2.610619  | 1.806775  |
| H | 3.582929   | 1.612494  | 1.278491  |
| H | 1.790100   | -1.091278 | -1.614640 |
| H | 2.216552   | -2.238493 | -3.438900 |
| H | 2.947513   | -3.455917 | -5.498444 |
| H | 5.325390   | -3.175340 | -6.313234 |
| H | 6.867598   | -1.690651 | -5.039777 |
| C | 1.223643   | 0.367005  | 0.656354  |
| C | -1.219845  | 0.638992  | 2.041432  |
| H | -2.162331  | 0.739315  | 2.589111  |
| C | -0.000851  | 0.225442  | -0.024716 |
| H | 0.002138   | 0.061764  | -1.106748 |
| C | -0.013082  | 0.744964  | 2.736324  |
| H | -0.017761  | 0.924094  | 3.815818  |
| C | 1.199505   | 0.625925  | 2.054566  |
| H | 2.135726   | 0.715154  | 2.614567  |
| C | -6.929957  | -2.169043 | -0.319966 |
| N | -7.503088  | -1.523751 | -1.335983 |
| C | -8.775466  | -1.807267 | -1.695536 |
| C | -9.487696  | -2.784535 | -0.967388 |
| N | -8.892497  | -3.424149 | 0.017558  |
| C | -7.649616  | -3.156962 | 0.375434  |
| N | -8.524226  | -0.118919 | -3.381396 |
| C | -8.948061  | 0.597744  | -4.429904 |
| C | -10.234771 | 0.375781  | -4.944202 |
| N | -11.020326 | -0.523396 | -4.374159 |
| H | -8.279817  | 1.353308  | -4.856959 |

|   |            |           |           |
|---|------------|-----------|-----------|
| H | -10.595067 | 0.960159  | -5.801377 |
| H | -11.285331 | -2.020160 | -2.942278 |
| H | -10.536364 | -3.014319 | -1.203572 |
| H | -7.174794  | -3.717415 | 1.191883  |
| H | -5.895654  | -1.942206 | -0.041353 |
| C | -10.611129 | -1.260784 | -3.363131 |
| C | -9.322495  | -1.062515 | -2.822342 |
| N | -7.078611  | 1.470836  | -1.018435 |
| C | -8.242263  | 2.122385  | -0.913586 |
| C | -8.464926  | 3.045033  | 0.112439  |
| C | -7.444225  | 3.286429  | 1.038050  |
| C | -6.227014  | 2.608590  | 0.908919  |
| C | -6.059296  | 1.701333  | -0.143154 |
| C | -4.821685  | 0.958943  | -0.409916 |
| N | -4.887557  | 0.144726  | -1.482035 |
| C | -3.854622  | -0.616351 | -1.906683 |
| C | -2.638404  | -0.557134 | -1.222748 |
| C | -2.505211  | 0.278973  | -0.090444 |
| C | -3.628737  | 1.036400  | 0.315918  |
| C | -4.168296  | -1.455976 | -3.070077 |
| N | -5.439355  | -1.342237 | -3.545390 |
| C | -5.853808  | -2.039695 | -4.607637 |
| C | -4.997090  | -2.927333 | -5.265426 |
| C | -3.687547  | -3.073729 | -4.795687 |
| C | -3.267121  | -2.331457 | -3.686189 |
| H | -9.026781  | 1.914368  | -1.647223 |
| H | -9.430449  | 3.554978  | 0.176304  |
| H | -7.590322  | 4.000648  | 1.854216  |
| H | -5.413229  | 2.790121  | 1.616351  |
| H | -3.562877  | 1.710800  | 1.173633  |
| H | -1.803847  | -1.181140 | -1.553051 |
| H | -2.246231  | -2.430587 | -3.307120 |
| H | -2.993145  | -3.760253 | -5.289873 |
| H | -5.364665  | -3.490294 | -6.128124 |
| H | -6.884052  | -1.905070 | -4.952947 |
| C | -1.229992  | 0.375502  | 0.644392  |

Table S3. Kohn-Sham orbitals obtained by  $[\{\text{Ru}^{\text{V}}(\text{O})(\text{bpy})\}_2(\text{tpy}_2\text{ph})]^{6+}$  obtained by BP86/SDD. The frontier orbitals of each set are in boldface.

| alpha      |                |                  |            | beta        |            |                |                  |            |             |
|------------|----------------|------------------|------------|-------------|------------|----------------|------------------|------------|-------------|
| #          | E / eV         | Contribution / % |            |             | #          | E / eV         | Contribution / % |            |             |
|            |                | Ru               | O          | L           |            |                | Ru               | O          | L           |
| 170        | -0.2905        | 8.2              | 5          | 86.7        | 170        | -0.2874        | 2.1              | 0.5        | 97.3        |
| 171        | -0.2904        | 8.1              | 4.9        | 87          | 171        | -0.2873        | 2.2              | 0.5        | 97.3        |
| 172        | -0.2884        | 3.8              | 2.4        | 93.8        | 172        | -0.2806        | 0.2              | 1.3        | 98.5        |
| 173        | -0.2882        | 8.7              | 5.8        | 85.5        | <b>173</b> | <b>-0.2764</b> | <b>5.9</b>       | <b>2.6</b> | <b>91.6</b> |
| 174        | -0.2874        | 29.2             | 19.3       | 51.6        | <b>174</b> | <b>-0.2745</b> | <b>65.6</b>      | <b>0</b>   | <b>34.3</b> |
| 175        | -0.286         | 27.6             | 17.3       | 55.1        | 175        | -0.2743        | 62.8             | 0.2        | 37          |
| 176        | -0.278         | 52               | 25         | 22.9        | 176        | -0.2186        | 40.3             | 33.4       | 26.3        |
| 177        | -0.2777        | 52.3             | 25.2       | 22.6        | 177        | -0.218         | 40.4             | 33         | 26.6        |
| 178        | -0.2759        | 35.9             | 16.1       | 48          | 178        | -0.2166        | 47.4             | 37.5       | 15          |
| <b>179</b> | <b>-0.2719</b> | <b>30.4</b>      | <b>12</b>  | <b>57.7</b> | 179        | -0.2163        | 47.4             | 37.5       | 15.1        |
| <b>180</b> | <b>-0.1797</b> | <b>5</b>         | <b>0.4</b> | <b>94.7</b> | 180        | -0.1754        | 11               | 2.5        | 86.4        |
| 181        | -0.1795        | 4.5              | 0.4        | 95          | 181        | -0.1752        | 10.8             | 2.5        | 86.8        |
| 182        | -0.1674        | 4                | 0.2        | 95.8        | 182        | -0.1642        | 1.4              | 0.1        | 98.6        |
| 183        | -0.1673        | 2.7              | 0.2        | 97.1        | 183        | -0.1641        | 1.3              | 0.1        | 98.6        |
| 184        | -0.1672        | 38.6             | 0.4        | 61          | 184        | -0.1621        | 5.6              | 1          | 93.5        |
| 185        | -0.1666        | 38.7             | 0.4        | 60.9        | 185        | -0.162         | 5.7              | 1          | 93.3        |
| 186        | -0.165         | 1.6              | 0          | 98.4        | 186        | -0.1495        | 39               | 0.3        | 60.7        |
| 187        | -0.1649        | 2.8              | 0          | 97.3        | 187        | -0.1488        | 39               | 0.3        | 60.7        |
| 188        | -0.1351        | 1.1              | 0          | 98.8        | 188        | -0.1336        | 1                | 0.1        | 98.9        |
| 189        | -0.1348        | 0.8              | 0          | 99.1        | 189        | -0.1329        | 1.3              | 0.1        | 98.7        |
| 190        | -0.1346        | 0.8              | 0          | 99.1        | 190        | -0.1328        | 1.2              | 0.1        | 98.7        |



Table S4. Kohn-Sham orbitals obtained by  $[\{\text{Ru}^{\text{V}}(\text{O})(\text{bpz})\}_2(\text{tpy}_2\text{ph})]^{6+}$  obtained by BP86/SDD. The frontier orbitals of each set are in boldface.

| alpha      |                |                  |            |             | beta       |                |                  |            |             |
|------------|----------------|------------------|------------|-------------|------------|----------------|------------------|------------|-------------|
| #          | E / eV         | Contribution / % |            |             | #          | E / eV         | Contribution / % |            |             |
|            |                | Ru               | O          | L           |            |                | Ru               | O          | L           |
| 170        | -0.2919        | 1                | 0.6        | 98.3        | 170        | -0.2829        | 5.7              | 0.4        | 93.9        |
| 171        | -0.2919        | 1                | 0.6        | 98.3        | 171        | -0.2806        | 25.7             | 0.8        | 73.6        |
| 172        | -0.2897        | 3.6              | 3.3        | 93.2        | 172        | -0.2805        | 23.8             | 0.5        | 75.6        |
| 173        | -0.2889        | 7.6              | 7.3        | 85.1        | <b>173</b> | <b>-0.2789</b> | <b>5</b>         | <b>1.7</b> | <b>93.3</b> |
| 174        | -0.2873        | 2.7              | 2          | 95.4        | <b>174</b> | <b>-0.2777</b> | <b>36.3</b>      | <b>0.3</b> | <b>63.3</b> |
| 175        | -0.2869        | 3                | 2.4        | 94.7        | 175        | -0.2773        | 33.8             | 0.8        | 65.4        |
| 176        | -0.2687        | 52.2             | 24.7       | 23.1        | 176        | -0.2128        | 40.1             | 31.6       | 28.4        |
| 177        | -0.268         | 53.8             | 25.3       | 20.9        | 177        | -0.2123        | 40.3             | 31.2       | 28.5        |
| 178        | -0.2672        | 55.1             | 26.4       | 18.5        | 178        | -0.2111        | 43.3             | 32         | 24.7        |
| <b>179</b> | <b>-0.2665</b> | <b>51.7</b>      | <b>24</b>  | <b>24.4</b> | 179        | -0.211         | 43.3             | 31.8       | 24.9        |
| <b>180</b> | <b>-0.1909</b> | <b>4.4</b>       | <b>0.4</b> | <b>95.1</b> | 180        | -0.1865        | 9.7              | 4          | 86.4        |
| 181        | -0.1909        | 4.4              | 0.4        | 95.2        | 181        | -0.1865        | 9.7              | 4          | 86.4        |
| 182        | -0.1793        | 5.6              | 0.5        | 94          | 182        | -0.1731        | 14.3             | 3.7        | 82          |
| 183        | -0.1784        | 5.9              | 0.5        | 93.6        | 183        | -0.1729        | 14.5             | 3.8        | 81.7        |
| 184        | -0.1647        | 1.4              | 0.1        | 98.5        | 184        | -0.1621        | 3.1              | 0.5        | 96.4        |
| 185        | -0.1646        | 1.4              | 0.1        | 98.4        | 185        | -0.162         | 3.2              | 0.5        | 96.4        |
| 186        | -0.1562        | 8.2              | 0.2        | 91.6        | 186        | -0.1536        | 2.1              | 0.2        | 97.8        |
| 187        | -0.1562        | 8                | 0.2        | 91.8        | 187        | -0.1536        | 2.1              | 0.2        | 97.7        |
| 188        | -0.154         | 3.2              | 0.1        | 96.7        | 188        | -0.1515        | 2.6              | 0.7        | 96.7        |
| 189        | -0.154         | 2.8              | 0.1        | 97          | 189        | -0.1515        | 2.5              | 0.7        | 96.8        |
| 190        | -0.1522        | 35.3             | 0.2        | 64.5        | 190        | -0.1377        | 36.6             | 0.2        | 63.2        |

Table S5. Mulliken and Löwdin (in parentheses) spin populations on the  $\text{Ru}^{\text{VO}^{3+}}$  fragment for the complexes  $[\text{Ru}^{\text{V}}(\text{O})(\text{L})(\text{tpy}_2\text{ph})\text{Ru}^{\text{V}}(\text{O})(\text{L})]^{6+}$  obtained by BP86/SDD and BP86/B3LYP/SDD.

|            | L = bpy     | L = bpz     |
|------------|-------------|-------------|
| BP86       |             |             |
| <i>Ru</i>  | 1.63 (1.57) | 1.41 (1.35) |
| <i>O</i>   | 0.99 (0.98) | 0.97 (0.96) |
| BP86/B3LYP |             |             |
| <i>Ru</i>  | 1.67 (1.67) | 1.70 (1.64) |
| <i>O</i>   | 1.13 (1.11) | 1.14 (1.11) |
